# Supplementary material for: Reusable Fe3O4 and WO3 immobilized onto montmorillonite as a photo-reactive antimicrobial agent
Source: Royal Society of Chemistry journal article supplement (doi:10.1039/c6ra08180k), 2016-01-01
Supplement: c6ra08180k1.pdf [file c6ra08180k1.pdf]

# **Reusable Fe<sub>3</sub>O<sub>4</sub> and WO<sub>3</sub> Immobilized onto Montmorillonite as a Photo-reactive Antimicrobial Agent**

*Mazrad Zihnil A.I.<sup>1</sup>, Insik in<sup>1,3\*</sup> and Sung Young Park<sup>1,2\*</sup>*

<sup>1</sup> Department of IT Convergence, Korea National University of Transportation, Chungju 380-702, Republic of Korea

<sup>2</sup> Department of Chemical and Biological Engineering, Korea National University of Transportation, Chungju 380-702, Republic of Korea

<sup>3</sup> Department of Polymer Science and Engineering, Korea National University of Transportation, Chungju 380-702, Republic of Korea

## Supporting Information

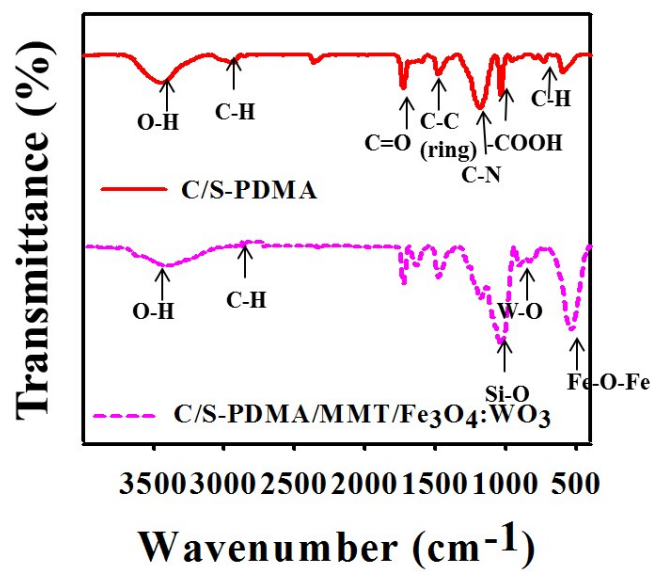

**Figure S1.** FT-IR spectra of C/S-PDMA, C/S-PDMA/MMT, C/S-PDMA/MMT/Fe<sub>3</sub>O<sub>4</sub>, and C/S-PDMA/MMT/Fe<sub>3</sub>O<sub>4</sub>:WO<sub>3</sub>.

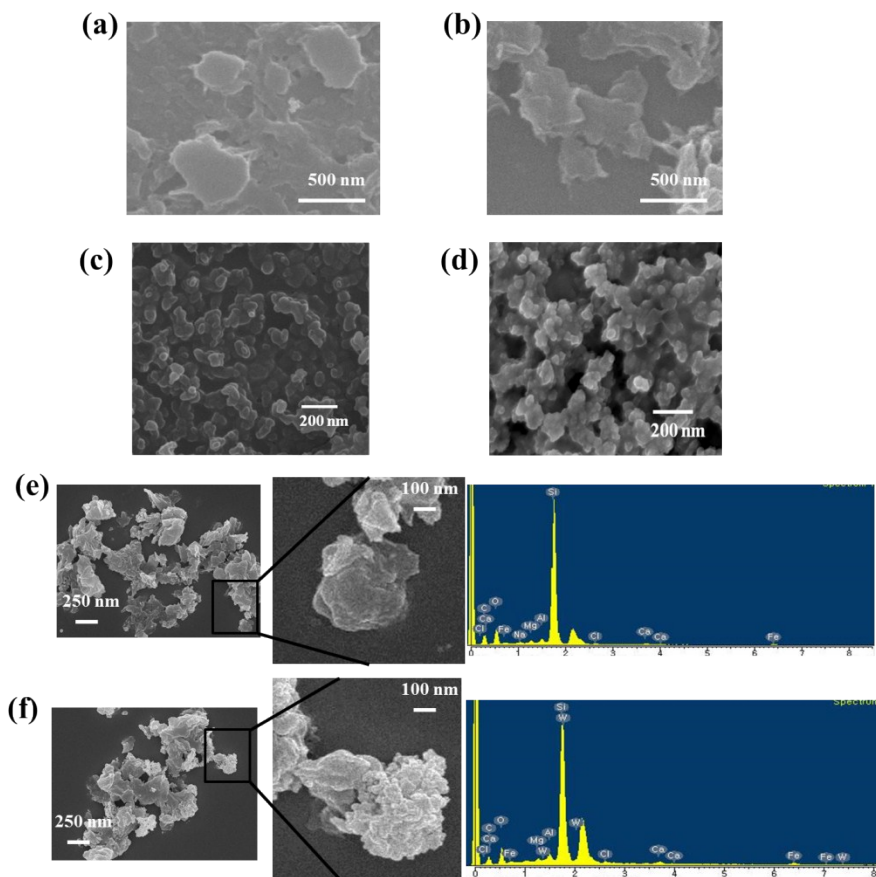

**Figure S2.** SEM images of **(a)** Pure MMT, **(b)** C/S-PDMA/MMT, **(c)** WO<sub>3</sub> metal oxide, **(d)** Fe<sub>3</sub>O<sub>4</sub> metal oxide **(e)** FE-SEM – EDX spectrum of C/S-PDMA/MMT/Fe<sub>3</sub>O<sub>4</sub>, and **(f)** FE-SEM – EDX spectrum of C/S-PDMA/MMT/Fe<sub>3</sub>O<sub>4</sub>:WO<sub>3</sub>.

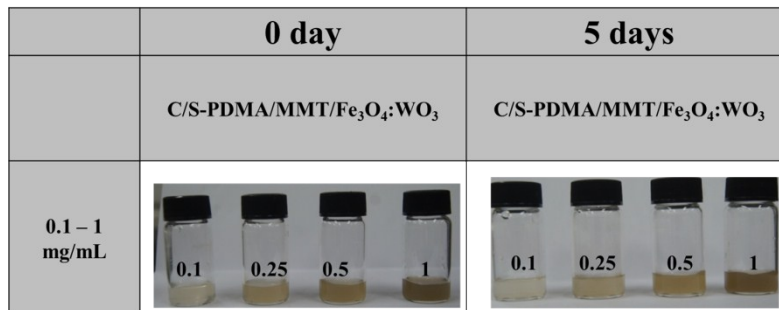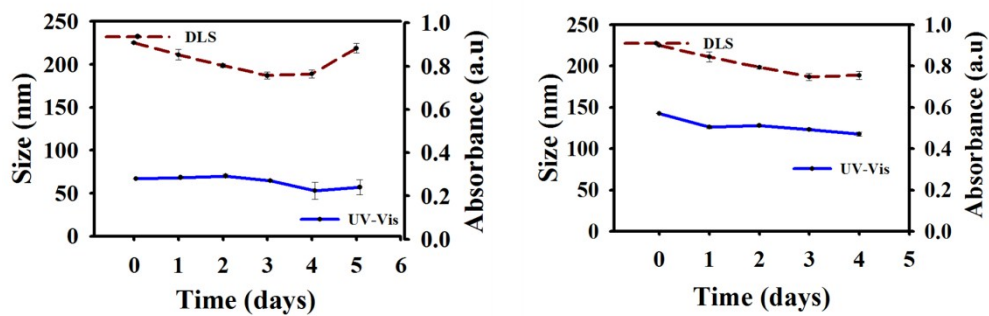

**Figure S3.** Time-dependent colloidal stability study of C/S-PDMA/MMT/Fe<sub>3</sub>O<sub>4</sub>:WO<sub>3</sub> in water [(0.1(left side)–0.25 mg/mL (right side))] between 1–5 days. The left axis indicate DLS measurements to evaluate the size distribution and right axis showed the UV–vis absorption at 808 nm.

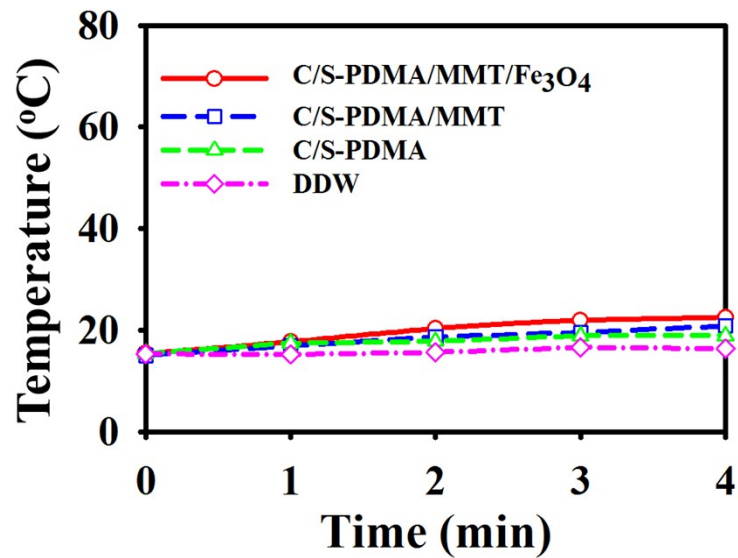

**Figure S4.** Photo-thermal heating curves of pure water (DDW), C/S-PDMA, C/S-PDMA/MMT, C/S-PDMA/MMT/Fe<sub>3</sub>O<sub>4</sub> (1 mg/mL concentration) under 808-nm laser irradiation with a power density of 2 W/cm<sup>2</sup>.

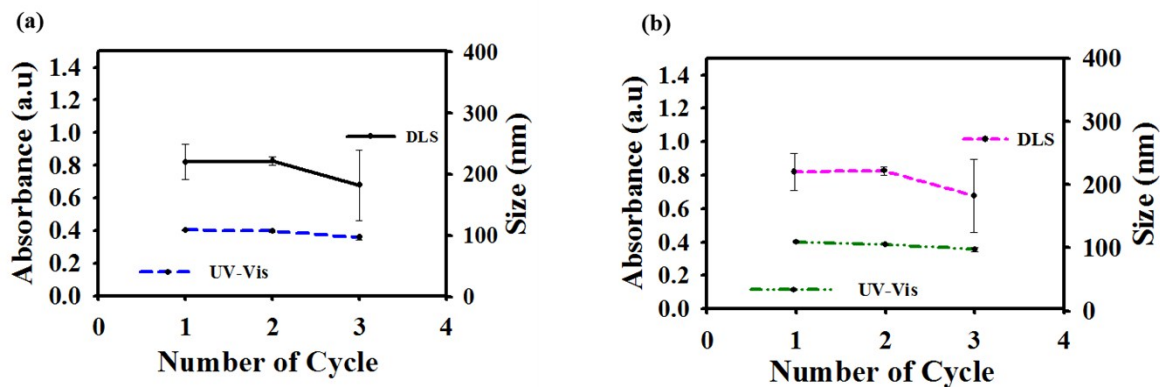

**Figure S5.** The colloidal stability study of C/S-PDMA/MMT/Fe<sub>3</sub>O<sub>4</sub>:WO<sub>3</sub> in water (1 mg/mL) in each step number of cycle towards (a) *E. coli* (b) *S. aureus*. The left axis indicate DLS measurements to evaluate the size distribution and right axis showed the UV-vis absorption at 808 nm.

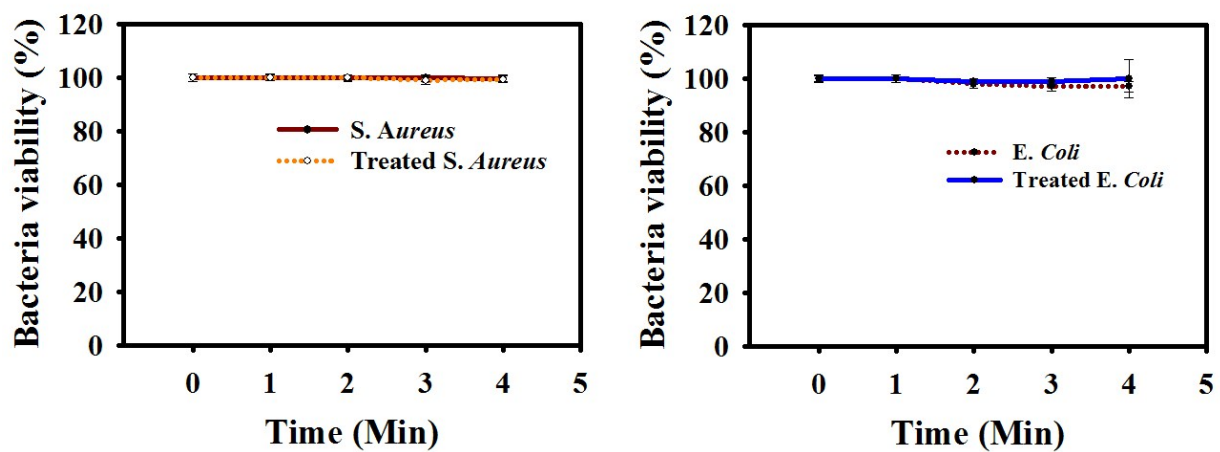

Figure S6. MTT bacteria cells treated C/S-PDMA/MMT/Fe<sub>3</sub>O<sub>4</sub>:WO<sub>3</sub> at 1 mg/mL concentration in solution. Right side is *S. aureus* and left is *E.coli*.

|               |               | Fe            |               | W             |               |
|---------------|---------------|---------------|---------------|---------------|---------------|
| Bacteria type |               | Gram positive | Gram negative | Gram positive | Gram negative |
| sample        | 0 cycle       | 0.146         | 0.142         | 0.45          | 0.45          |
|               | After 3 cycle | 0.1261        | 0.1251        | 0.4036        | 0.3924        |
| Percentage    |               | 91%           | 90.10%        | 89.70%        | 89.20%        |

**Table S1.** The identification and the quantification of F and W component determined by the ICP-MS analysis.
